# Supplementary material
Source: Springer Nature journal article supplement (https://www.springermedizin.de/resource/supplementary/13550_2012_109_MOESM1_ESM.pdf/9687592)

A

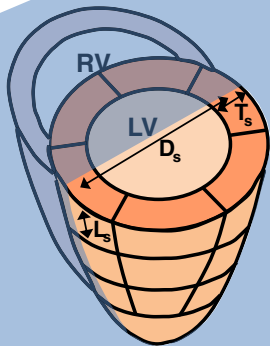

B

Ns = 6 6 6 2

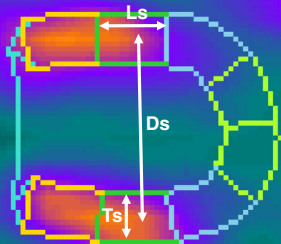

Supplement: MOESM1 [file 9687592]
